# Supplementary material
Source: Springer Nature journal article supplement (https://www.springermedizin.de/resource/supplementary/12958_2007_410_MOESM2_ESM.pdf/9567902)

*hpg*

*+/+*

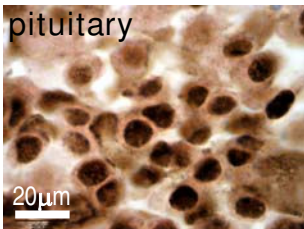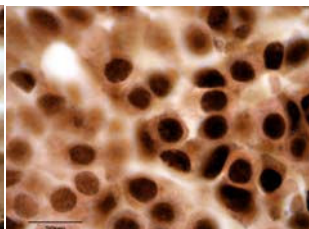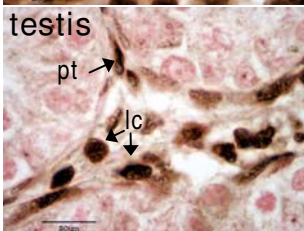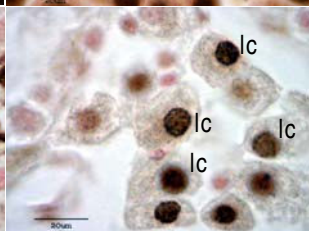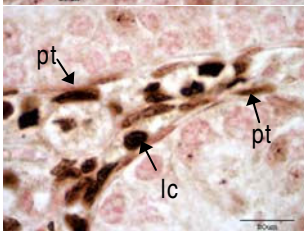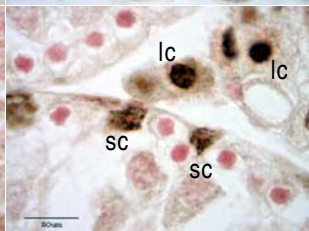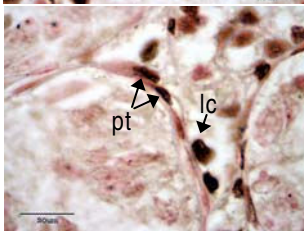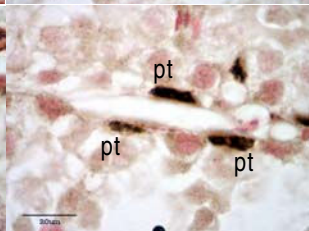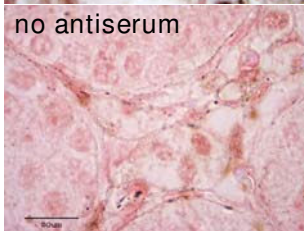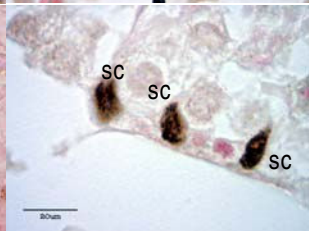

Supplement: MOESM2 [file 9567902]
